# Supplementary material
Source: publisher site journal article supplement (https://www.dovepress.com/article/374029)
Supplement: Supplementary file 1 [file get_supplementary_file.php]

##### Wolaita Sodo University, Collage of Health Sciences and Medicine,

##### School of Medical Laboratory Sciences

##### Survey Questionnaire developed to collect information on “Undiagnosed sero-prevalence of hepatitis B and C virus infections in the community of Wolaita Zone, Southern Ethiopia”

##### Do you agree to participate? 1. Yes 2. No

##### Date of the interview: ______

##### Any question contact Abera Kumalo (0911807270) & Dr. Takele T. (0911806643)

##### Part I: Socio-demographic factors

##### Age in year ________________

##### Gender 1. Male 2. Female

##### Residence 1. Rural 2. Urban

##### Educational status 1. < 9 grade 2. 9-12 grade 3. Diploma and above

##### Occupation 1. Farmer 2. Housewife 3. Gov’t employed 4. Student 5. Merchant 6. Other______

##### Marital status: 1. Single 2. Married 3. Divoured 4. Widowed

##### Income (write exact amount) _____________________

##### ****Part II: Behavioral risk factors****

##### History of blood transfusions; 1. Yes 2. No

##### History of IV drug injection; 1. Yes 2. No

##### History of abortion or miscarriage 1. Yes 2. No

##### History of surgical procedure 1. Yes 2. No

##### History of dental extraction 1. Yes 2. No

##### History of hospital admission 1. Yes 2. No

##### History of circumcision/FGM 1. Yes 2. No

##### History of per-rectal exam 1. Yes 2. No

##### History of needle stick injury; 1. Yes 2. No

##### History of sharing needles, syringes, or other drug-injection equipment 1. Yes 2. No

##### History of sharing items such as razors or toothbrushes with an infected person 1. Yes 2. No

##### History of direct contact with the blood or open sores of an infected person 1. Yes 2. No

##### History of exposure to blood from needle sticks or other sharp instruments 1. Yes 2. No

##### History of have history of sexually transmitted disease 1. Yes 2. No

##### History of living with a person who has chronic Hepatitis B 1. Yes 2. No

##### Vaccination history of Hepatitis B 1. Yes 2. No

##### History of taking hepatitis B examinations 1. Yes 2. No

##### **Body piercing 1. Yes 2. No**

##### **Tattoo 1. Yes 2. No**

##### **Jaundice**

1. Yellow coloration of skin 1. Yes 2. No
2. Yellow coloration of sclera 1. Yes 2. No
3. Yellow coloration of mucous membrane 1. Yes 2. No

##### **Contact with Jaundice 1. Yes 2. No**

##### **Ulcer 1. Yes 2. No**

##### **Smoking cigarette 1. Yes 2. No**

##### **Consumes Alcohol 1. Yes 2. No**

##### **Multi partner sex 1. Yes 2. No**

##### **Condom use during sex 1. Yes 2. No**
